# Supplementary material for: Analyzing the Role of Banks in Providing Green Finance for Retail Customers: The Case of Germany
Source: MDPI journal article supplement (doi:10.3390/su15118745), 2023-05-29
Supplement: s1 [file s1]

## Supplementary Material

### Determining Cronbach's Alpha (Taber 2018)

$$\alpha = \frac{N\bar{c}}{(\bar{v} + (N-1) \cdot \bar{c})} = \frac{N}{N-1} \left( 1 - \frac{\sum_{i=1}^N \sigma_{Y_i}^2}{\sigma_X^2} \right) \quad \text{with} \quad X = \sum_{i=1}^N Y_i$$

Where:

N: The number of components (e.g., items or subscales).

$\sigma_X^2$  : The variance of the observed total test scores.

$\sigma_{Y_i}^2$  : The variance of component i for the current sample of subjects.

$\bar{v}$  : The average variance of each component (e.g., items or subscales).

$\bar{c}$  : The average of all covariances between components for the current sample of individuals (i.e., excluding the variance of each component).

### Determining Simple Matching (Sokal and Michener 1958)

$$x = \frac{(a + d)}{(a + b + c + d)}$$

Where:

a : Number of codes or variable values that are identical in both compared documents.

d : number of codes or variable values that do not appear in both documents

b and c : number of codes or variable values that only occur in one document

**Table S1. Simple matching of coded segments in interviews [0;1].**

|                                               | I1   | I2   | I3    | I4    | I5    | I6    | I7    | I8    | I9    | I10  |
|-----------------------------------------------|------|------|-------|-------|-------|-------|-------|-------|-------|------|
| I1 (finance institute)                        | 1.00 | 0.86 | 0.71  | 0.68  | 0.76  | 0.70  | 0.81  | 0.74  | 0.77  | 0.75 |
| I2 (finance institute)                        | 0.86 | 1.00 | 0.74  | 0.76  | 0.75  | 0.76  | 0.80  | 0.69  | 0.76  | 0.78 |
| I3 (finance institute)                        | 0.71 | 0.74 | 10.00 | 0.75  | 0.78  | 0.79  | 0.74  | 0.72  | 0.75  | 0.68 |
| I4 (finance institute)                        | 0.68 | 0.76 | 0.75  | 10.00 | 0.77  | 0.76  | 0.80  | 0.75  | 0.78  | 0.65 |
| I5 (environmental NGO)                        | 0.76 | 0.75 | 0.78  | 0.77  | 10.00 | 0.77  | 0.75  | 0.75  | 0.86  | 0.74 |
| I6 (finance institute)                        | 0.70 | 0.76 | 0.79  | 0.76  | 0.77  | 10.00 | 0.71  | 0.73  | 0.75  | 0.75 |
| I7 (two interlocutors from finance institute) | 0.81 | 0.80 | 0.74  | 0.80  | 0.75  | 0.71  | 10.00 | 0.75  | 0.78  | 0.69 |
| I8 (two regulatory experts)                   | 0.74 | 0.69 | 0.72  | 0.75  | 0.75  | 0.73  | 0.75  | 10.00 | 0.78  | 0.64 |
| I9 (environmental NGO)                        | 0.77 | 0.76 | 0.75  | 0.78  | 0.86  | 0.75  | 0.78  | 0.78  | 10.00 | 0.69 |
| I10 (finance institute)                       | 0.75 | 0.78 | 0.68  | 0.65  | 0.74  | 0.75  | 0.69  | 0.64  | 0.69  | 1.00 |

## References

Sokal R.R. & Michener C.D. (1958) A statistical method for evaluating systematic relationships. The University of Kansas Scientific Bulletin 38: 1409-1438.

Taber, K.S. The Use of Cronbach's Alpha When Developing and Reporting Research Instruments in Science Education. Res Sci Educ 48, 1273–1296 (2018). <https://doi.org/10.1007/s11165-016-9602-2>
